# Supplementary material for: mtDNA Single-Nucleotide Variants Associated with Type 2 Diabetes
Source: MDPI journal article supplement (doi:10.3390/cimb45110548), 2023-10-30
Supplement: s1 [file s1]

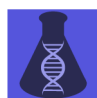

## Supplementary Materials

**Table S1.** Frequency distribution of the different haplogroups in diabetic and control cases.

| Macrohaplogroup        | ALL<br>N=2366 (100%) | Controls<br>N=1105 (46.7%) | T2D<br>N=1261 (53.3%) |
|------------------------|----------------------|----------------------------|-----------------------|
| <b>Haplogroups L</b>   |                      |                            |                       |
| L4                     | 1 (0.08)             | 0 (0.00)                   | 1 (0.08)              |
| L3                     | 2 (0.16)             | 0 (0.00)                   | 2 (0.16)              |
| <b>Haplogroups M</b>   |                      |                            |                       |
| M (includes Q)         | 10 (0.86)            | 6 (0.54)                   | 4 (0.32)              |
| M7                     | 48 (4.02)            | 19 (1.72)                  | 29 (2.30)             |
| M8 (includes C, Z)     | 9 (0.71)             | 0 (0.00)                   | 9 (0.71)              |
| M9 (includes E)        | 22 (1.80)            | 5 (0.45)                   | 17 (1.35)             |
| G                      | 10 (0.84)            | 4 (0.36)                   | 6 (0.48)              |
| D                      | 64 (5.32)            | 22 (1.99)                  | 42 (3.33)             |
| <b>Haplogroups N</b>   |                      |                            |                       |
| N1 (includes I)        | 65 (5.52)            | 33 (2.99)                  | 32 (2.54)             |
| N2 (includes W)        | 33 (2.82)            | 18 (1.63)                  | 15 (1.19)             |
| N9 (includes Y)        | 16 (1.36)            | 8 (0.72)                   | 8 (0.63)              |
| A                      | 13 (1.06)            | 3 (0.27)                   | 10 (0.79)             |
| X                      | 31 (2.57)            | 10 (0.90)                  | 21 (1.67)             |
| <b>Haplogroups R</b>   |                      |                            |                       |
| R (includes P)         | 7 (0.57)             | 1 (0.09)                   | 6 (0.48)              |
| R0 (includes HV, H, V) | 1070 (90.36)         | 492 (44.52)                | 578 (45.84)           |
| JT (includes J, T)     | 411 (34.96)          | 211 (19.10)                | 200 (15.86)           |
| R9 (includes F)        | 43 (3.62)            | 19 (1.72)                  | 24 (1.90)             |
| B                      | 49 (4.13)            | 22 (1.99)                  | 27 (2.14)             |
| U (includes K)         | 462 (39.23)          | 232 (21.00)                | 230 (18.24)           |

**Table S2.** Proportion test of mtDNA variants associated to type 2 diabetes.

| Variant    | X <sup>2</sup> | 95% IC              | p-Value    |
|------------|----------------|---------------------|------------|
| m.1438A>G  | 53.326         | 0.5565098 0.5977890 | 2.826e-13* |
| m.14766C>T | 53.326         | 0.5565098 0.5977890 | 2.826e-13* |
| m.16519T>C | 180.18         | 0.3383346-0.3784139 | <2.2e-16*  |

\* Statistical difference with *p* value < 0.05; df = 1.**Table S3.** Pearson's Chi-squared test with Yates' continuity correction of mtDNA variants associated to type 2 diabetes. Significant differences were identified between variants m.1438A>G and m.14766C>T as m.1438A>G and m.16519T>C. In the table are showed statistic as X<sup>2</sup>(*p*-value).

| Variants   | m.1438A>G           | m.14766C>T     | m.16519T>C |
|------------|---------------------|----------------|------------|
| m.1438A>G  | -                   |                |            |
| m.14766C>T | 76.435 (<2.2e-16) * | -              |            |
| m.16519T>C | 81.9 (<2.2e-16) *   | 1.8746 (0.171) | -          |

\* Statistical difference with *p* value < 0.05; df = 1.

**Table S4.** Standardized residual test and Bonferroni adjustment of mtDNA variants associated to type 2 diabetes. \* Statistical difference with  $p$  value < 0.05.**m.1438A>G**

| Variant | Type 2 diabetes | Control     |
|---------|-----------------|-------------|
| Present | -3.1790157*     | 0.7386723   |
| Absent  | 3.0827652       | -0.7163076* |

**m.14776C>T**

| Variant | Type 2 diabetes | Control    |
|---------|-----------------|------------|
| Present | -5.310265*      | 6.205626   |
| Absent  | 5.149487        | -6.017740* |

**m.16519T>C**

| Variant | Type 2 diabetes | Control    |
|---------|-----------------|------------|
| Present | -1.552454*      | 1.159618   |
| Absent  | 1.505451        | -1.124508* |

**Table S5.** Standardized residual test and Bonferroni adjustment between mtDNA. variants associated to type 2 diabetes. \*Statistical difference with  $p$  value < 0.05.**m.1438A>G vs. m.14776C>T**

| Loci |   | 14776      |            |
|------|---|------------|------------|
|      |   | C          | T          |
| 1438 | A | 5.598096   | -6.541988* |
|      | G | -1.300767* | 1.520089   |

$X^2 = 76.435$ ,  $df = 1$ ,  $p\text{-value} = <2.2e-16$ .

**m.1438A>G vs. m.16519T>C**

| Loci |   | 16519      |            |
|------|---|------------|------------|
|      |   | T          | C          |
| 1438 | A | 7.139048   | -5.332567* |
|      | G | -1.658821* | 1.239069   |

$X^2 = 76.453$ ,  $df = 1$ ,  $p\text{-value} = <2.2e-16$ .

**m.14776C>T vs. m.16519T>C**

| Loci  |   | 16519     |             |
|-------|---|-----------|-------------|
|       |   | T         | C           |
| 14776 | C | 0.7363876 | -0.5500504* |

|   |             |           |
|---|-------------|-----------|
| T | -0.8605495* | 0.6427941 |
|---|-------------|-----------|

---

$X^2 = 1.8746$ ,  $df = 1$ ,  $p\text{-value} = 0.171$ .

**Table S6.** List of pre graduate students who collaborated in different stages of the process and analysis carried out in this project as part of the activities during the Pacific Scientific and Technological Research Summer Program 2019-2022 <https://programadelfin.org.mx>, in the research lines *Automation for Detection of Heteroplasmy in Mitochondrial Sequences*, *Mitochondrial Genomics associated with Chronic Degenerative Diseases* and *Applications of Data Science in Health*.

**Benemérita Universidad Autónoma de Puebla**

Baneco Rodas Ixchel Xiadani  
 Bernabé Gaspar Luis Eduardo  
 Blanco Aguilar Maria Esther  
 Delgado Gaytán Alexandra Viridiana  
 del Valle García Tania  
 Diaz De Lucio Yrving Daniel  
 Escobedo Valdez Gloria  
 Gómez Rodríguez Amairani  
 Jaimez Alvarado Samuel  
 Ortiz Virgen Edwin Gerardo  
 Quebrado Benitez Ángel Sebastian  
 Reyes Ramírez Lucianny Guadalupe  
 Romero Balboa Osorio Adriana  
 Vázquez Páez María Fernanda  
 Yarce Cabrera Luis Miguel

**Instituto Politécnico Nacional (Ciudad de México)**

Flores Reyes Ana Karen  
 González Sánchez Alhelí Rocío  
 Juarez Hernandez Misael Alejandro  
 Vélez Solís Carlos Alberto

**Instituto Tecnológico de Los Mochis (Sinaloa)**

Lugo Martinez Perla Yareli  
 Ruelas Ortiz Daniela  
 Velázquez Mercado Mariesther del Rosario

**Universidad Autónoma de Baja California**

Sara María Zárate Soto

**Universidad Autónoma de Chiapas**

Ballardo Vega Nancy Yrasema  
 Méndez Hernández Dulce Paola

**Universidad Autónoma de Occidente (Sinaloa)**

Astorga Leal Fátima  
Báez Cervantes Sanelly  
Castro Leal Lilia Judith  
Luna Valdez María Angélica  
Pacheco Álvarez Astrid  
Santana Quintero Luis Fernando  
Zamudio Ahumada Reyna Consuelo

**Universidad Autónoma de Tamaulipas**

Amaro Diaz Samantha Guadalupe  
Hernández Luna Jesús Alberto

**Universidad Autónoma del Estado de México**

del Moral Bastida Jesús Armando  
Vargas Contreras María José  
Alvarez Nava Mario  
Valdez Romero Juan Jesus  
Rodriguez Piña Miriam Deyanira

**Universidad de Guadalajara**

Acosta Romero Ernesto  
Alvarez Martínez José de Jesús  
Ascencio Reyes Juan Manuel  
Barrera LujánXimena Paola  
Campos Murillo Alejandra  
Domínguez Sandoval María Fátima  
García Navarro Cesar Oswaldo  
Gaspar Zuno Jesús Salvador  
Gómez Castellanos Víctor Eduardo  
Guizar López Rafael  
Gutiérrez Luévanos Josué  
Guzmán Vázquez Juan José  
Jiménez Zermeño Lizbeth Deyanira  
Mariscal Quirarte Karla Alejandra  
Martínez Merlo David  
Medina España Nayeli Tatiana  
Mendoza Prado Jessica Verónica  
Meraza Abarca Carlos Daniel  
Morales Hernández Andrea Anahí  
Muñoz Navarro Krystal Sofía  
Pedroza Mata María Guadalupe  
Sánchez Gutiérrez María Fernanda

Sierra Picos María Fernanda  
Vargas Ocegüera Erick Alejandro  
Velasco Pérez Nidia Guadalupe  
Xicotencatl Soto Elizabeth Patricia

**Universidad Autónoma de Guerrero**

Jesus Alberto Meza Hernandez

**Universidad Autónoma de Sinaloa**

Ballardo Vega Nancy Yrasema  
Lao García Angelina  
Luque Camacho Carmen Alejandra  
Moraila García Beatriz Guadalupe  
Rábago Monzón Juan Eduardo  
Romero Iturrios Jaciel Eduardo  
Soto Gómez Dzidzielia Dejanira  
Torres Melchor Erika Liliana

**Universidad de Monterrey**

Saavedra Hernández Annel  
Eugenia Urbina Arias Natalia

**Universidad de Sonora**

Carranza Cruz Vania Sofia

**Universidad Popular Autónoma del Estado de Puebla**

Contreras Cerón Luis Manuel

**Universidad Veracruzana**

Velazquez Melchor Mariana

**Universidad Vizcaya de las Américas (Mérida, Yucatán)**

Sierra Tuz\_Shelby Christel

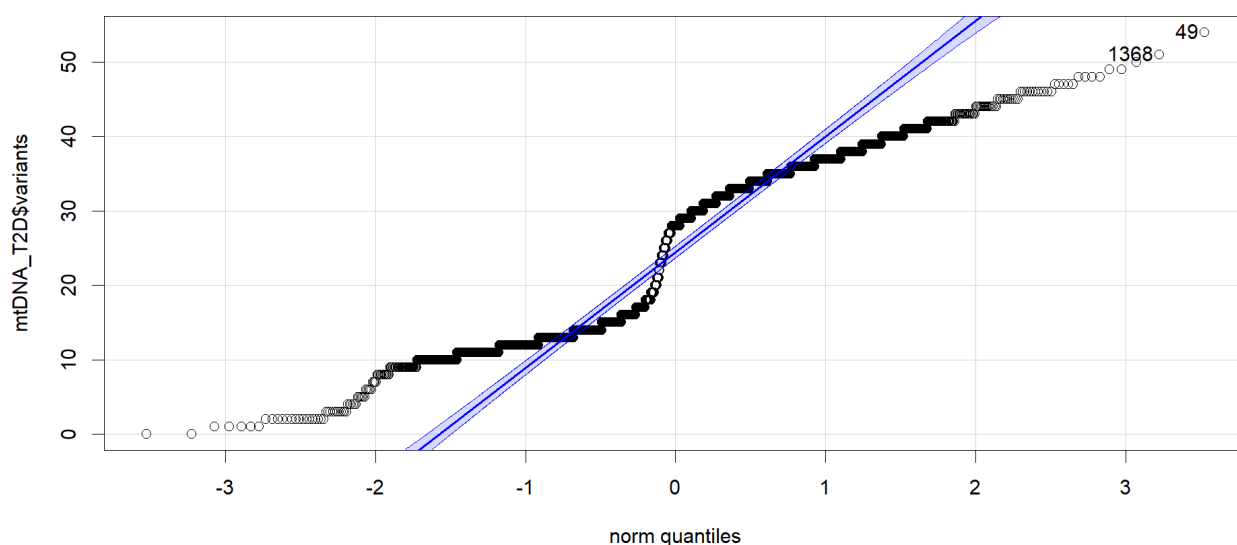

**Figure S1.** Qqplot to explore normality in number of variants per sequence in 2366. mtDNA chromosomes obtained of type diabetes cases and controls. Kolmogorov Smirnov with Lilliefors correction obtain a  $D$  statistic equal to 0.17113 with a  $p$ -value  $< 2.2e-16$ , demonstrating that the data have a non-parametric distribution outside normality. Since the data are discrete, a Pearson normality test was also performed corroborating the maximum result.

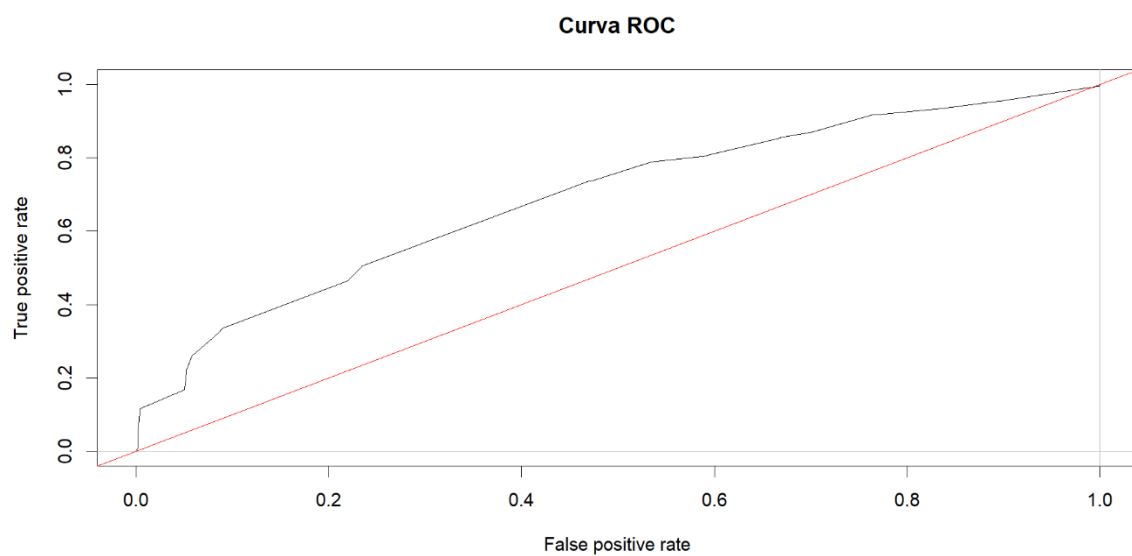

Call: glm(formula = Dx ~ m.73A>G + m.1189T>C + m.1193T>C + m.1420T>C + m.1438A.>G + m.1811A>G + m.2667T>C + m.3027T>C + m.10398A>G + m.14766C>T + m.16126T>C + m.16519T>C, family = binomial, data = data\_base)

Deviance Residuals: Min -2.2363, 1Q -1.1391, Median 0.5615, 3Q 1.1718, Max 2.1528.

Coefficients: (2 not defined because of singularities)

| Estimate    | Std. Error | z value | Pr(> z ) |              |
|-------------|------------|---------|----------|--------------|
| (Intercept) | 0.96212    | 0.21050 | 4.571    | 4.86e-06 *** |
| m.73A.G     | 1.43941    | 0.16153 | 8.911    | < 2e-16 ***  |
| m.1189T.C   | -0.45868   | 0.30003 | -1.529   | 0.126323     |

|              |          |           |         |              |
|--------------|----------|-----------|---------|--------------|
| m.1193T.C    | 10.92498 | 324.74374 | 0.034   | 0.973163     |
| m.1420T.C    | NA       | NA        | NA      | NA           |
| m.1438A.G2   | -0.76045 | 0.22262   | -3.416  | 0.000636 *** |
| m.1811A.G    | -0.25097 | 0.20613   | -1.218  | 0.223395     |
| m.2667T.C NA | NA       | NA        | NA      |              |
| m.3027T.C    | 0.46311  | 0.52232   | 0.887   | 0.375265     |
| m.10398A.G   | 0.49912  | 0.13907   | 3.589   | 0.000332 *** |
| m.14766C.T2  | -2.04259 | 0.15259   | -13.386 | < 2e-16 ***  |
| m.16126T.C   | -0.37249 | 0.13756   | -2.708  | 0.006773 **  |
| m.16519T.C2  | -0.18837 | 0.09758   | -1.931  | 0.053544     |

---

Signif. codes: 0 \*\*\* 0.001\*\* 0.01\* 0.05

(Dispersion parameter for binomial family taken to be 1)

Null deviance: 3110.1 on 2244 degrees of freedom.

Residual deviance: 2838.9 on 2234 degrees of freedom, AIC: 2860.9

**Figure S2.** Generalized linear model and risk prediction evaluation with receiver operating characteristic (ROC) curve between mtDNA variants associated to type 2 diabetes. True positive rate (sensitivity) against the false positive rate (1-specificity) for the different possible cut points of presence of variants m.73A>G, m.1189T>C, m.1193T>C, m.1420T>C, m.1438A>G, m.1811A>G, m.2667T>C, m.3027T>C, m.10398A>G, m.14766C>T, m.16126T>C and m.16519T>C. The estimated area under the curve (AUC) was 0.6911773.
